# Supplementary material for: Overcoming the fragility – X-ray computed micro-tomography elucidates brachiopod endoskeletons
Source: PubMed Central journal article supplement (PMC4312452; doi:10.1186/s12983-014-0065-x), 2014-09-27
Supplement: 12983_2014_65_MOESM1_ESM.pdf [file 12983_2014_65_MOESM1_ESM.pdf]

| Order                               | Species                                                 | Location                                          | Date       | GPS                            | Depth[m] | Collector                 | ZMB      |
|-------------------------------------|---------------------------------------------------------|---------------------------------------------------|------------|--------------------------------|----------|---------------------------|----------|
| Terebratulida („long loops“)        |                                                         |                                                   |            |                                |          |                           |          |
|                                     | <i>Calloria inconspicua</i><br>(Sowerby, 1846)          | Pudding Island, Otago<br>Peninsula, NZ            | 02.02.2003 | 044°00'00" S,<br>168°00'00" E  | 0.5      | C. Lüter                  | Bra 2246 |
|                                     | <i>Dallina septigera</i><br>(Lovén, 1846)               | DTE, NW of Scotland,<br>St. 3 ( also St. 4)       | 05.08.1898 | 057°26'00" N,<br>001°28'00" W  | 79       | DTE                       | Bra 2260 |
|                                     | <i>Laqueus rubellus</i><br>(Sowerby, 1846)              | Hakodate, Japan                                   | –          | 041°70'00" N,<br>140°75'00" E  | –        | F. M. Hilgendorf          | Bra 2259 |
|                                     | <i>Megathiris detruncata</i><br>(Gmelin, 1789)          | Canico, Madeira, cave,<br>Mediterranean           | 10.11.1959 | 032°40'00" N,<br>016.50'00" W  | 12       | P. Wirtz                  | Bra 2257 |
|                                     | <i>Megerlia truncata</i><br>(Linnaeus, 1767)            | La Calle, Mediterranean                           | –          | –                              | –        | A. O. Kowalewski          | Bra 2258 |
|                                     | <i>Platidia</i> sp.<br>(gen. Costa, 1852)               | SO208 / St. 17, W-Pacific,<br>W of Costa Rica     | 21.07.2010 | 008°44.69' N,<br>090°43.54 W   | 3300     | N. Furchheim              | Bra 2256 |
|                                     | <i>Pumilus antiquatus</i><br>Atkins, 1958               | Pudding Island, Otago<br>Peninsula, NZ            | 02.02.2003 | 044°00'00" S,<br>168°00'00" E  | 0.5      | C. Lüter                  | Bra 2252 |
|                                     | <i>Terebratella sanguinea</i><br>(Leach, 1814)          | Doubtful Sound, South<br>Island, NZ               | 12.06.1996 | 045°22'03" S,<br>167°00'70" E  | –        | P. Meredith               | Bra 2247 |
| Terebratulida („short loops“)       |                                                         |                                                   |            |                                |          |                           |          |
|                                     | <i>Eucalathis</i> sp.<br>(gen. Fischer & Oehlert, 1890) | RV MSM19 / 1076-1,<br>S-Atlantic, SW of S. Africa | 04.12.2011 | 040°22.46' S,<br>014°53.77' E  | 2018     | N. Furchheim              | SEM      |
|                                     | <i>Gryphus vitreus</i><br>(Born, 1778)                  | Neapel, Mediterranean                             | –          | –                              | –        | F. Blochmann              | Bra 2261 |
|                                     | <i>Liothyrella neozelanica</i><br>(Thomson, 1918)       | Doubtful Sound, Bauza<br>Island, NZ               | 12.06.1996 | 045°22'03" S,<br>167°00'70" E  | –        | P. Meredith               | Bra 2255 |
|                                     | <i>Terebratulina retusa</i><br>(Linnaeus, 1958)         | Norway                                            | –          | –                              | –        | Sars                      | Bra 2253 |
|                                     | <i>Rectocalathis schemmgregoryi</i><br>n. gen., n. sp.  | SO205 / St. 40,<br>NE Pacific                     | 05.05.2010 | 011°47'56"N,<br>116°49'85"W    | 3954     | –                         | Bra 2254 |
| Rhynchonellida                      |                                                         |                                                   |            |                                |          |                           |          |
|                                     | <i>Hemithiris psittacea</i><br>(Gmelin, 1790)           | Balsfjord Berg, Tromsø,<br>Norway                 | July, 1998 | 069°34'07" N,<br>018°54'03" E  | 64       | C. Wolter                 | Bra 2245 |
|                                     | <i>Notosaria nigricans</i><br>(Sowerby, 1846)           | Karitane Point, NZ                                | 02.05.1996 | 043°34'00" S,<br>172°37'50" E  | 10       | S. Carson,<br>J. Fyfe     | Bra 2244 |
| Thecideida                          |                                                         |                                                   |            |                                |          |                           |          |
|                                     | <i>Pajaudina atlantica</i> 1<br>Logan, 1988             | Puerto Naos "Arrecife<br>de la casa", NE Atlantic | 24.06.2006 | 028°35'20" N,<br>017°54'62" W  | 20       | G. Maghon,<br>J. Hoffmann | Bra 2248 |
|                                     | <i>Pajaudina atlantica</i> 2<br>Logan, 1988             | Puerto Naos "Arrecife<br>de la casa", NE Atlantic | 24.06.2006 | 028°35'20" N,<br>017°54'62" W  | 20       | G. Maghon,<br>J. Hoffmann | Bra 2249 |
|                                     | <i>Pajaudina atlantica</i> 3<br>Logan, 1988             | Puerto Naos "Arrecife<br>de la casa", NE Atlantic | 24.06.2006 | 028°35'20" N,<br>017°54'62" W  | 20       | G. Maghon,<br>J. Hoffmann | Bra 2250 |
|                                     | <i>Thecidellina</i> sp.<br>(gen. Thompon, 1915)         | Osprey Reef, North Horn,<br>Coral Sea, AUS        | 3.12.2009  | 013°48'05" S,<br>146°32'46" E  | 6        | C. Lüter                  | Bra 2251 |
| Craniida (inarticulate brachiopods) |                                                         |                                                   |            |                                |          |                           |          |
|                                     | <i>Neoancistrocrania norfolki</i><br>Laurin, 1992       | Norfolk 2, DW 2024,                               | 27.10.2003 | 023°27'92" S,<br>167°50'90" E  | 370      | –                         | Bra 2242 |
|                                     | <i>Novocrania anomala</i><br>(Müller, 1776)             | Tyreholmen, Danmark                               | –          | 054°53'31" N,<br>012°2'45.9" E | –        | F. Blochmann              | Bra 2243 |
