# Supplementary material for: Overcoming the fragility – X-ray computed micro-tomography elucidates brachiopod endoskeletons
Source: PubMed Central journal article supplement (PMC4312452; doi:10.1186/s12983-014-0065-x), 2014-09-27
Supplement: 12983_2014_65_MOESM2_ESM.pdf [file 12983_2014_65_MOESM2_ESM.pdf]

| Specimen                                                 | Vol. total<br>[mm <sup>3</sup> ] | Vol. VV<br>[mm <sup>3</sup> ] | Vol. DV<br>[mm <sup>3</sup> ] | Vol. Spic.<br>Loph [mm <sup>3</sup> ] | Vol. spic. DV/<br>VV [mm <sup>3</sup> ] | Length VV<br>[mm] | Length DV<br>[mm] | Width VV<br>[mm] | Width DV<br>[mm] | Height VV<br>[mm] | Height DV<br>[mm] |
|----------------------------------------------------------|----------------------------------|-------------------------------|-------------------------------|---------------------------------------|-----------------------------------------|-------------------|-------------------|------------------|------------------|-------------------|-------------------|
| <i>Calloria inconspicua</i><br>(Sowerby, 1846)           | 565,05                           | 328,5                         | 230,8                         | x                                     | x / x                                   | 20,8              | 17,2              | 18,8             | 18,8             | 6,1               | 5,5               |
| <i>Dallina septigera</i><br>(Lovén, 1846)                | 653,22                           | 383,9                         | 259,5                         | x                                     | x / x                                   | 26,4              | 22,2              | 19,3             | 19,3             | 11,4              | 5,0               |
| <i>Laqueus rubellus</i><br>(Sowerby, 1846)               | 310,42                           | 158,0                         | 144,0                         | 0,1                                   | 1,59 / 1,37                             | 22,2              | 19,7              | 17,9             | 17,9             | 6,8               | 5,4               |
| <i>Megathiris detruncata</i><br>(Gmelin, 1789)           | 24,54                            | 14,6                          | 8,4                           | x                                     | x / x                                   | 4,1               | 4,1               | 8,1              | 8,1              | 2,2               | 1,2               |
| <i>Megerlia truncata</i><br>(Linnaeus, 1767)             | 60,07                            | 26,9                          | 24,9                          | 1,7                                   | 2,6 / 3                                 | 9,5               | 8,4               | 11,7             | 11,7             | 2,1               | 1,4               |
| <i>Platidia anomioides</i><br>(Scacchi & Philippi, 1844) | 4,25                             | 2,5                           | 1,7                           | 0,2                                   | 0,02 / x                                | 4,9               | 4,5               | 5,4              | 5,4              | 1,1               | 0,3               |
| <i>Pumilus antiquatus</i><br>Atkins, 1958                | 6,11                             | 3,6                           | 2,4                           | 0,1                                   | x / x                                   | 4,3               | 3,5               | 3,4              | 3,0              | 1,2               | 1,6               |
| <i>Terebratella sanguinea</i><br>(Leach, 1814)           | 882,75                           | 534,3                         | 337,2                         | x                                     | x / x                                   | 30,6              | 26,6              | 31,7             | 31,6             | 8,2               | 5,9               |
| <i>Eucalathis</i> sp.<br>(gen. Fischer & Öhlert, 1890)   | na                               | na                            | na                            | na                                    | na                                      | 4,3               | 3,8               | 4                | 4                | 1,5               | 1,1               |
| <i>Gryphus vitreus</i><br>(Born, 1778)                   | 682,22                           | 441,2                         | 223,3                         | 5,0                                   | 7,1 / 1,72                              | 32,6              | 29,3              | 28,5             | 28,5             | 10,8              | 7,6               |
| <i>Liothyrella neozelanica</i><br>(Thomson, 1918)        | 1399,05                          | 772,7                         | 551,0                         | 7,6                                   | 34 / 26                                 | 42,3              | 38,67             | 40,0             | 40,0             | 13,0              | 7,6               |
| <i>Terebratulina retusa</i><br>(Linnaeus, 1958)          | 194,2                            | 104,5                         | 88,4                          | 1,8                                   | 1,1 / 1,23                              | 18,2              | 16,4              | 14,7             | 14,7             | 5,0               | 3,6               |
| <i>Rectocalathis schemmgregoryi</i><br>n. gen., n. sp    | 3,77                             | 2,0                           | 1,5                           | 0,2                                   | 0,01/ x                                 | 4,5               | 4,0               | 4,4              | 4,4              | 1,0               | 0,8               |
| <i>Hemithiris psittacea</i><br>(Gmelin, 1790)            | 317,38                           | 175,6                         | 141,0                         | x                                     | x / x                                   | 15,5              | 18,6              | 18,7             | 18,7             | 5,3               | 5,8               |
| <i>Notosaria nigricans</i><br>(Sowerby, 1846)            | 331,9                            | 170,0                         | 161,0                         | x                                     | x / x                                   | 17,5              | 14,9              | 20,0             | 20,0             | 4,3               | 5,3               |
| <i>Pajaudina atlantica 1 male</i><br>Logan, 1988         | 78,7                             | 54,7                          | 24,0                          | x                                     | x / 0,16                                | 7,2               | 5,2               | 5,9              | 5,4              | 3,1               | 1,3               |
| <i>Thecidellina</i> sp.<br>(gen. Thomson, 1915)          | 30,1                             | 21,3                          | 8,8                           | x                                     | x / x                                   | 6                 | 5                 | 5                | 4,9              | 3                 | 1,1               |
| <i>Neoancistrocrania norfolki</i><br>Laurin, 1992        | 1072,7                           | 868,0                         | 192,0                         | x                                     | x / x                                   | 15,6              | 15,6              | 17,8             | 16,8             | 9,4               | 4,9               |
| <i>Novocrania anomala</i><br>(Müller, 1776)              | 25,24                            | 0,0                           | 25,2                          | x                                     | x / x                                   | x                 | 8,6               | x                | 9,0              | x                 | 2,6               |
