# Supplementary material for: Overcoming the fragility – X-ray computed micro-tomography elucidates brachiopod endoskeletons
Source: PubMed Central journal article supplement (PMC4312452; doi:10.1186/s12983-014-0065-x), 2014-09-27

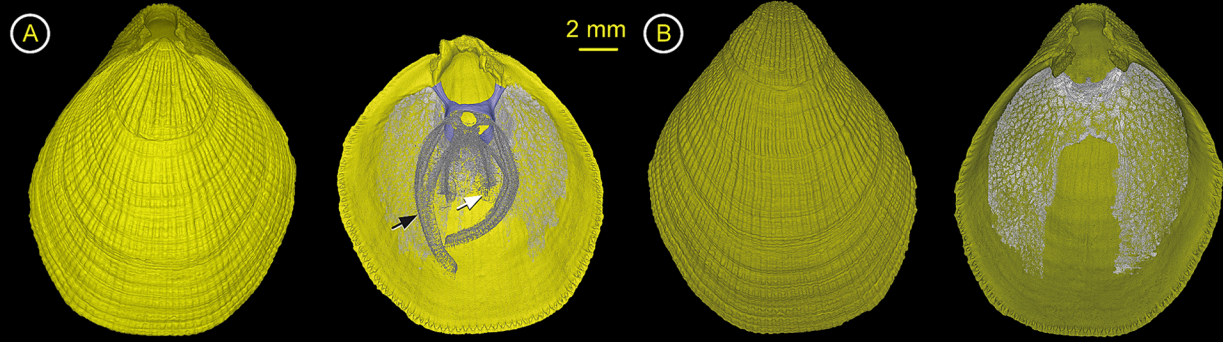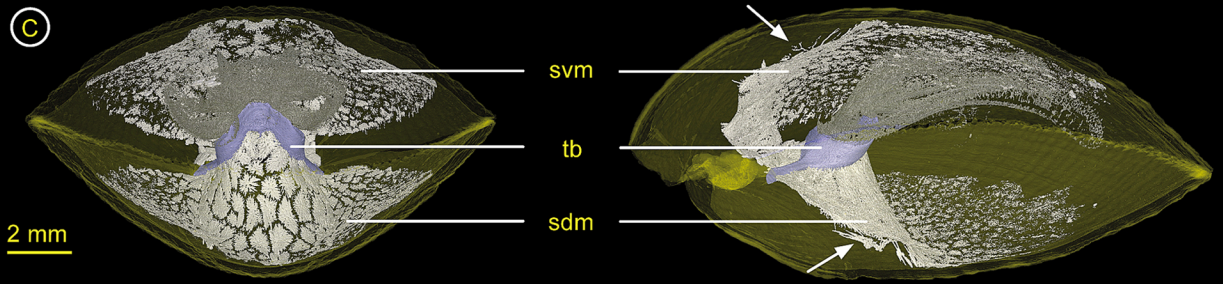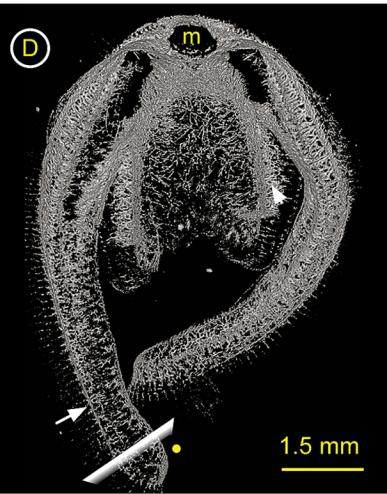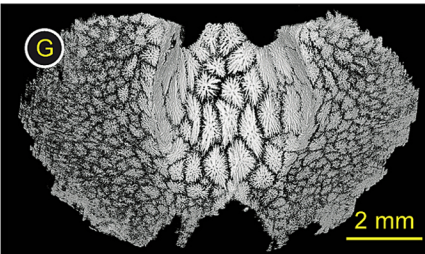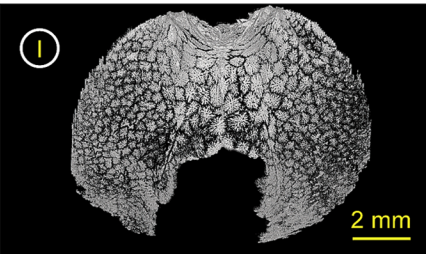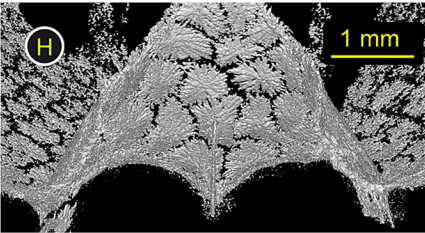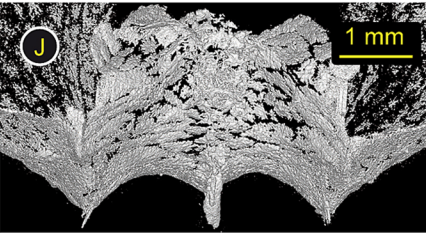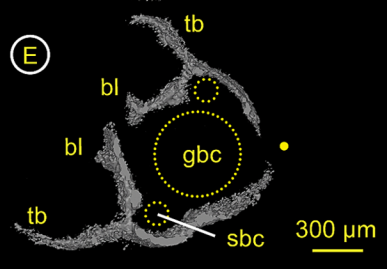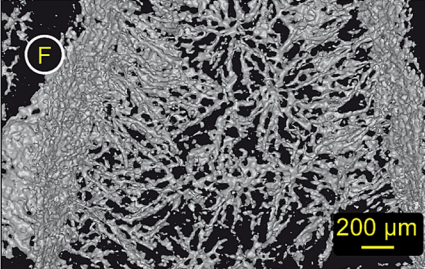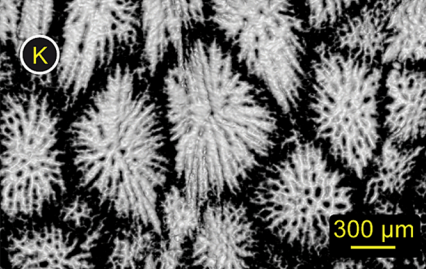

Supplement: 12983_2014_65_MOESM3_ESM.pdf [file 12983_2014_65_MOESM3_ESM.pdf]
