# Supplementary material for: Overcoming the fragility – X-ray computed micro-tomography elucidates brachiopod endoskeletons
Source: PubMed Central journal article supplement (PMC4312452; doi:10.1186/s12983-014-0065-x), 2014-09-27
Supplement: 12983_2014_65_MOESM18_ESM.pdf [file 12983_2014_65_MOESM18_ESM.pdf]

|                         | Species        | Family     | Dorsal valve  | Ventral valve                    | Lophophore           |                                   |             |  |  |  |
|-------------------------|----------------|------------|---------------|----------------------------------|----------------------|-----------------------------------|-------------|--|--|--|
| Craniida                | Rhynchonellida | Thecideida | “long loops”  | <i>Platidia anomioides</i> *     | (Platidiidae)        |                                   |             |  |  |  |
|                         |                |            |               | <i>Megerlia truncata</i> *       | (Kraussinidae)       |                                   |             |  |  |  |
|                         |                |            |               | <i>Pumilus antiquatus</i> *      | (Kraussinidae)       |                                   |             |  |  |  |
|                         |                |            |               | <i>Megathiris detruncata</i>     | (Megathyrididae)     |                                   |             |  |  |  |
|                         |                |            |               | <i>Laqueus rubellus</i> *        | (Laqueidae)          |                                   |             |  |  |  |
|                         |                |            |               | <i>Terebratella sanguinea</i>    | (Terebratellidae)    |                                   |             |  |  |  |
|                         |                |            |               | <i>Calloria inconspicua</i>      | (Terebratellidae)    |                                   |             |  |  |  |
|                         |                |            |               | <i>Dallina septigera</i>         | (Dallinidae)         |                                   |             |  |  |  |
|                         |                | Thecideida | “short loops” | <i>Terebratulina retusa</i> *    | (Cancellothyrididae) |                                   |             |  |  |  |
|                         |                |            |               | <i>Liothyrella neozelanica</i> * | (Terebratulidae)     |                                   |             |  |  |  |
|                         |                |            |               | <i>Gryphus vitreus</i> *         | (Terebratulidae)     |                                   |             |  |  |  |
|                         |                |            |               | <i>Eucalathis</i> sp. *          | (Chlidonophoridae)   |                                   |             |  |  |  |
|                         |                |            |               | <i>Rectocalathis</i> n. gen.     | (Chlidonophoridae)   |                                   |             |  |  |  |
|                         |                |            |               | <i>schemmgregoryi</i> n. sp.*    |                      |                                   |             |  |  |  |
|                         |                |            |               | <i>Pajaudina atlantica</i> *     | (Thecideidae)        |                                   |             |  |  |  |
| <i>Thecidellina</i> sp. | (Thecideidae)  |            |               |                                  |                      |                                   |             |  |  |  |
| Craniida                | Rhynchonellida | Thecideida | “short loops” | <i>Hemithiris psittacea</i>      | (Hemithirididae)     |                                   |             |  |  |  |
|                         |                |            |               | <i>Notosaria nigricans</i>       | (Hemithirididae)     |                                   |             |  |  |  |
|                         |                |            |               | <i>Novocrania anomala</i>        | (Craniidae)          |                                   |             |  |  |  |
|                         |                |            |               |                                  |                      | <i>Neoancistrocrania norfolki</i> | (Craniidae) |  |  |  |
