# Supplementary material for: Overcoming the fragility – X-ray computed micro-tomography elucidates brachiopod endoskeletons
Source: PubMed Central journal article supplement (PMC4312452; doi:10.1186/s12983-014-0065-x), 2014-09-27
Supplement: 12983_2014_65_MOESM19_ESM.pdf [file 12983_2014_65_MOESM19_ESM.pdf]

| Specimens                           | Number Images | Voltage (kV) | Current ( $\mu$ A) | Timing Value (ms) | Averaging & Skip | Magnification | Scan Time ~ (min) |
|-------------------------------------|---------------|--------------|--------------------|-------------------|------------------|---------------|-------------------|
| <i>Calloria inconspicua</i>         | 900           | 90           | 150                | 750               | 2 – 1            | 4,6           | 45                |
| <i>Dallina septigera</i>            | 900           | 90           | 200                | 750               | 2 – 1            | 3,5           | 45                |
| <i>Eucalathis</i> sp.               | 900           | 60           | 130                | 750               | 2 – 1            | 13.2          | 45                |
| <i>Gryphus vitreus</i>              | 900           | 80           | 280                | 750               | 2 – 1            | 3,1           | 45                |
| <i>Hemithiris psittacea</i>         | 900           | 90           | 200                | 750               | 2 – 1            | 4,4           | 45                |
| <i>Laqueus rubellus</i>             | 900           | 90           | 200                | 750               | 2 – 1            | 4,4           | 45                |
| <i>Liothyrella neozelanica</i>      | 900           | 80           | 280                | 750               | 2 – 1            | 2,4           | 45                |
| <i>Megathiris detruncata</i>        | 900           | 60           | 140                | 750               | 2 – 1            | 12,1          | 45                |
| <i>Megerlia truncata</i>            | 900           | 60           | 170                | 750               | 2 – 1            | 8             | 45                |
| <i>Rectocalathis schemmgregoryi</i> | 900           | 60           | 100                | 750               | 2 – 1            | 17,6          | 45                |
| <i>Neoancistrocrania norfolki</i>   | 900           | 90           | 150                | 750               | 2 – 1            | 4,9           | 45                |
| <i>Notosaria nigricans</i>          | 900           | 90           | 150                | 750               | 2 – 1            | 4,9           | 45                |
| <i>Novocrania anomala</i>           | 900           | 60           | 170                | 750               | 2 – 1            | 8             | 45                |
| <i>Pajaudina atlantica</i> 1        | 900           | 60           | 170                | 750               | 2 – 1            | 10            | 45                |
| <i>Pajaudina atlantica</i> 2        | 900           | 60           | 170                | 750               | 2 – 1            | 10            | 45                |
| <i>Pajaudina atlantica</i> 3        | 900           | 35/ 50       | 350/ 240           | 750               | 2 – 1            | 8             | 45                |
| <i>Platidia</i> sp.                 | 900           | 70           | 110                | 750               | 2 – 1            | 13,3          | 45                |
